# Supplementary material
Source: publisher figshare collection journal article supplement (https://gsajournals.figshare.com/articles/dataset/_/6100139)
Supplement: Supplementary file 1 [file 1]

# Sex determination in *Ceratopteris richardii* is accompanied by transcriptome changes that drive epigenetic reprogramming of the young gametophyte: supplementary material

Nadia M. Atallah<sup>\*,1</sup>, Olga Vitek<sup>†</sup>, Federico Gaiti<sup>‡</sup>, Milos Tanurdzic<sup>§,1</sup> and Jo Ann Banks<sup>\*\*,1</sup>

<sup>\*</sup>Purdue University Center for Cancer Research, Purdue University, West Lafayette, IN 47907, United States, <sup>†</sup>College of Computer and Information Science, Northeastern University, Boston, MA 02115, United States, <sup>‡</sup>Department of Medicine, Weill Cornell Medicine and New York Genome Center, New York, NY 10013, United States, <sup>§</sup>School of Biological Sciences, The University of Queensland, St. Lucia, Australia, <sup>\*\*</sup>Department of Botany and Plant Pathology, Purdue University, West Lafayette, IN, 47907, United States

**ABSTRACT** The fern *Ceratopteris richardii* is an important model for studies of sex determination and gamete differentiation in homosporous plants. Here we use RNA-seq to *de novo* assemble a transcriptome and identify genes differentially expressed in young gametophytes as their sex is determined by the presence or absence of the male-inducing pheromone called antheridiogen. Of the 1,163 consensus differentially expressed genes identified, the vast majority (1,030) are up-regulated in gametophytes treated with antheridiogen. Our GO term enrichment analyses of these DEGs reveals that a large number of genes involved in epigenetic reprogramming of the gametophyte genome are up-regulated by the pheromone. Additional hormone response and development genes are also up-regulated by pheromone. This *C. richardii* transcriptome and gene expression dataset will prove useful for studies focusing on sex determination and differentiation in plants.

## KEYWORDS

Sex determination  
RNA-seq  
*Ceratopteris*  
gametophyte  
epigenetics  
gibberellin  
antheridiogen  
transcriptome

## SUPPLEMENTAL TABLES

**Table S1.** A list of qRT-PCR primers used in expression validation.

**Table S2.** Run metrics for Trinity assembly and differential expression analysis.

**Table S3.** Excel spreadsheet of ABA and GA primary biosynthetic and signaling components. Components were identified by using the *Ceratopteris* gametophyte transcriptome as a query and the *Arabidopsis* proteome (TAIR10) database.

**Table S4.** Excel spreadsheet of all 1,163 differentially expressed genes and statistical support.

■ Table S1 qRT PCR Primers

| Gene                            | Forward Sequence          | Reverse Sequence         |
|---------------------------------|---------------------------|--------------------------|
| <i>CrEF1<math>\alpha</math></i> | 5'CAGACCAGTCGGAGCAAAAGT'3 | 5'TCCTGTGGGAAGGGTGGAA'3  |
| comp39080                       | 5'CGCAAGGGATAGCCAAATTA'3  | 5'CGATCTCAACGCGATCTACA'3 |
| comp82638                       | 5'CTGCTGCCTCTCAGTGTGAC'3  | 5'ATCACGCGCTTGTAGGACTT'3 |
| comp114251                      | 5'AGCTCAAATGCCACCACTTT'3  | 5'ACATAGCCGCTGCTGTTCTT'3 |
| comp38095                       | 5'ATGCCGAATGGAAGACTGTT'3  | 5'TTCATATTCGGCGACTCCTT'3 |
| comp82048                       | 5'GGTATGACGCCACAGAACCT'3  | 5'TGCAGACATTGCAGGATACC'3 |
| comp103387                      | 5'TCGAAAGAGAGGCAACACCT'3  | 5'ACTTTCCGAGAAGCAGTGGA'3 |
| comp46913                       | 5'TGGGCAAACCTTCAGGTAAGG'3 | 5'TGAGGCTGTGTGAGAGATGC'3 |
| comp105977                      | 5'AGGAAATCGCTGGACGTAGA'3  | 5'CCTCATCCTTCCAACATCGT'3 |
| comp110703                      | 5'GAGGTAAGGCAAGCGCTCTA'3  | 5'CCAACGGCCATGAGAAGTAT'3 |
| comp109704                      | 5'GGCGAAATACCTGCAAATGT'3  | 5'TCACGACACACAACCACAGA'3 |
| comp84184                       | 5'ATGGGCAGATGGTGGAAATA'3  | 5'TGACCATTGTCTCCCTCAGA'3 |

■ **Table S2 Run Metrics, assembly and analysis statistics for the combined,  $-A_{CE}$  and  $+A_{CE}$  datasets**

|                             | $-A_{CE}1$    | $-A_{CE}2$    | $-A_{CE}3$    | $+A_{CE}1$    | $+A_{CE}2$    | $+A_{CE}3$    |
|-----------------------------|---------------|---------------|---------------|---------------|---------------|---------------|
| Run Metrics                 |               |               |               |               |               |               |
| Total bases                 | 3,062,485,438 | 1,576,208,121 | 3,371,604,624 | 3,779,164,066 | 3,303,557,793 | 3,387,042,171 |
| Total reads                 | 30,321,638    | 15,606,021    | 33,382,224    | 37,417,466    | 32,708,493    | 33,535,071    |
| Average GC%                 | 47            | 47            | 47            | 46            | 46            | 46            |
| % reads Phred scores >20    | 95            | 95            | 93            | 96            | 96            | 96            |
| % reads Phred scores >30    | 71            | 73            | 65            | 76            | 86            | 86            |
| Number reads aligned        | 10,934,932    | 12,955,923    | 18,336,178    | 30,072,430    | 26,072,076    | 26,617,968    |
| % reads aligned             | 88            | 87            | 89            | 88            | 88            | 88            |
| Analysis                    |               |               |               |               |               |               |
|                             | Combined Data | $-A_{CE}$     | $+A_{CE}$     |               |               |               |
| DESeq DEGs                  | 1,183         | 140           | 1,043         |               |               |               |
| edgeR DEGs                  | 3,700         | 1,585         | 2,115         |               |               |               |
| EBSeq DEGs                  | 3,065         | 1,065         | 2,000         |               |               |               |
| Consensus DEGs              | 1,163         | 133           | 1,030         |               |               |               |
| Assembly                    |               |               |               |               |               |               |
| Total transcripts assembled | 206,059       |               |               |               |               |               |
| Total genes as-sembled      | 111,977       |               |               |               |               |               |
| N50                         | 1,988         |               |               |               |               |               |
| Min length                  | 151           |               |               |               |               |               |
| Max length                  | 17,306        |               |               |               |               |               |
| Average length              | 867           |               |               |               |               |               |
| Genes with read support     | 82,820        |               |               |               |               |               |

SUPPLEMENTAL FIGURES

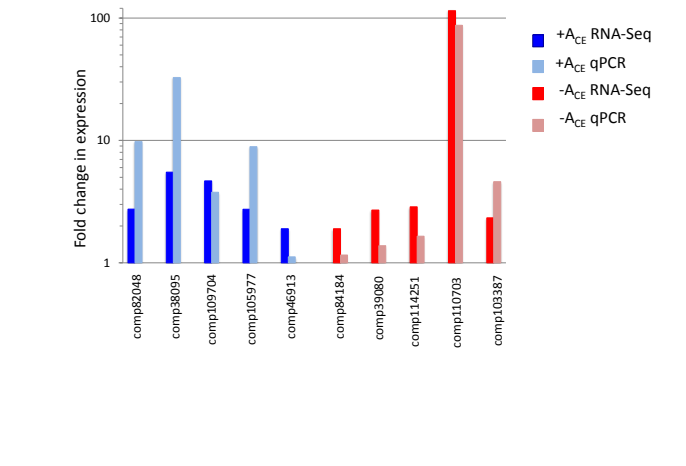

**Figure S1** Comparison of gene expression from qRT-PCR vs. RNA-Seq. The fold changes for the qRT-PCR data were calculated using the  $\Delta C_t$  method (Livak and Schmittgen 2001). Blue bars show fold change for genes with higher expression in + $A_{CE}$  samples, red bars show fold changes for genes more highly expressed in - $A_{CE}$  samples. The genes comp46913 and comp84184 did not exhibit significant differences between + $A_{CE}$  and - $A_{CE}$  samples.

LITERATURE CITED

Livak, K. J. and T. D. Schmittgen, 2001 Analysis of relative gene expression data using real-time quantitative pcr and the 2- $\delta\delta C_t$  method. *methods* 25: 402–408.

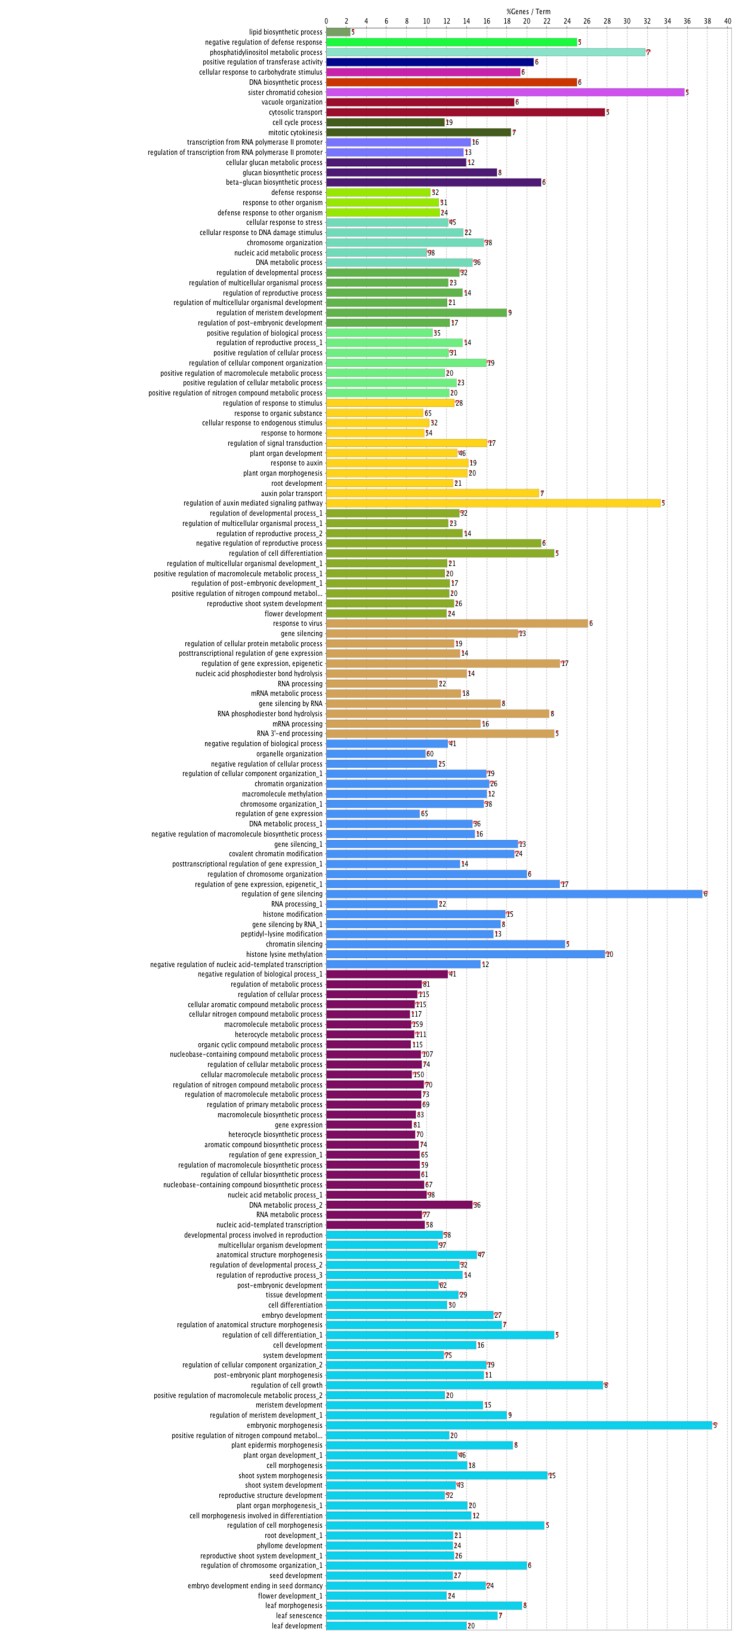

**Figure S2** GO terms associated with each node in Figure 3. Numbers above bars indicate number of genes mapped to the category and red asterisks indicate degree of statistical significance.
